# Supplementary material
Source: PubMed Central journal article supplement (PMC2818175)
Supplement: NIHMS146903-supplement-1_si_001.pdf [file NIHMS146903-supplement-1_si_001.pdf]

# Aliphatic Imines in Titanium-Mediated Reductive Cross-Coupling: Unique Reactivity of Ti(Oi-Pr)<sub>4</sub> / *n*-BuLi

Michael A. Tarselli and Glenn C. Micalizio\*  
The Scripps Research Institute - Scripps Florida  
Department of Chemistry  
130 Scripps Way, 3A2  
Jupiter, FL 33458

## Supporting Information

**Experimental Data: pp. 2-7**

**<sup>1</sup>H and <sup>13</sup>C spectra: pp. 8-18**

**References: p. 18**

**General Information:** All reactions were conducted in flame-dried glass flasks under an argon atmosphere unless otherwise specified. Diethyl ether, tetrahydrofuran, and toluene were dried over activated alumina columns and sparged with argon prior to use. Ti(Oi-Pr)<sub>4</sub> (Aldrich, 97%) was distilled prior to use (69-70 °C, <1 Torr). Butyllithium was titrated by the method of Love et al.<sup>1</sup> Imines **8**, **14**, **16**, and **22** were prepared according to Jacobsen.<sup>2</sup> In most cases, the imine could be used without further purification for titanium couplings. Vinylcyclohexanol **18** was prepared by addition of vinylmagnesium bromide to cyclohexanone, followed by distillation (40-43 °C / <1 Torr). 2-phenylpropen-1-ol **20** was prepared according to Carpenter.<sup>3</sup> Allenes **24**<sup>4</sup>, **26**, and **28**<sup>5</sup> were prepared according to Naota.<sup>6</sup> Allene **30** was prepared according to Crabbé.<sup>7</sup>

<sup>1</sup>H NMR data were recorded in CDCl<sub>3</sub> at 400 MHz on a Bruker AM-400 with calibration of spectra to residual CHCl<sub>3</sub> (7.26 ppm). <sup>13</sup>C data were recorded at 100 MHz on a Bruker AM-400 with calibration to the central line of CDCl<sub>3</sub> (77.00 ppm). Infrared spectra were recorded on a PerkinElmer SpectrumOne FT-IR instrument. HRMS data (DART-TOF ionization) were obtained by the University of Florida Mass Spectrometry lab, usually as (M + H<sup>+</sup>) or (M + Na<sup>+</sup>) ions.

Flash column chromatography was performed using Silicycle SiliaFlash P60 silica gel, 40-63 μm particle size. Compounds purified in this manner were sufficiently pure (NMR) to be used in subsequent transformations.

## Experimental Data

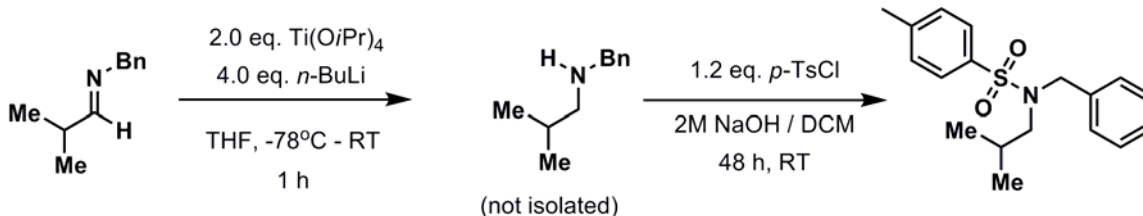

**N-tosyl-N-benzyl-isobutyl amine (11)**: To a solution of freshly distilled  $\text{Ti}(\text{O}i\text{-Pr})_4$  (0.59 mL, 2.0 mmol, 2 eq.) in THF (8 mL) at  $-78^\circ\text{C}$  is added  $n\text{-BuLi}$  (1.7 mL of 2.5M solution in hexanes, 4.0 mmol, 4 eq.), resulting in a bright orange solution. After stirring 5 minutes, imine **8** (163 mg, 1.0 mmol) is added in 0.5 mL THF dropwise by syringe, forming a bright yellow-orange solution. This solution is allowed to warm to rt over 1 h, during which it turns light brown, then deep brown-red. After 1 h, to the reaction is added saturated  $\text{NH}_4\text{Cl}_{(\text{aq})}$  (1.2 mL), and the resultant blue suspension left to stir 10 minutes at rt to break up metal salts. The reaction is filtered, and the residue rinsed 3x with 2 mL EtOAc. The crude oil after evaporation is subjected immediately to the next step.

To the clear oil (~200 mg) is added 1.5 mL of 2M NaOH (3 mmol, 3 eq.) and  $p$ -toluenesulfonyl chloride (240 mg, 1.25 mmol, 1.25 eq.) in 2 mL  $\text{CH}_2\text{Cl}_2$ . The resulting biphasic suspension is stirred vigorously over 2 d, then extracted with dichloromethane (5 mL, 3x), washed with water and brine, and dried over anhyd.  $\text{MgSO}_4$ . Column chromatography (1:10  $\text{Et}_2\text{O}$  / Hex) yields 160 mg **11** as a clear oil, which solidifies over a few days. 50% yield, 2 steps.  $^1\text{H}$  (400 MHz,  $\text{CDCl}_3$ ): 7.71 (d,  $J = 8$  Hz, 2H), 7.30-7.19 (m, 7H), 4.29 (s, 2H), 2.88 (d,  $J = 8$  Hz, 2H), 2.43 (s, 3H), 1.63 (m, 1H), 0.73 (d,  $J = 6.8$  Hz, 6H).  $^{13}\text{C}$  (100MHz,  $\text{CDCl}_3$ ): 143.1, 137.0, 136.6, 129.7, 128.5, 128.4, 127.6, 127.3, 56.4, 53.0, 26.9, 21.5, 20.0. IR (thin film, NaCl disk,  $\text{cm}^{-1}$ ): 2961, 2926, 2871, 1455, 1337, 1158, 1025, 815, 775, 736, 699, 656, 549. HRMS: Calculated for  $\text{C}_{18}\text{H}_{23}\text{NO}_2\text{S} + \text{Na}$  340.1342, observed 340.1331.

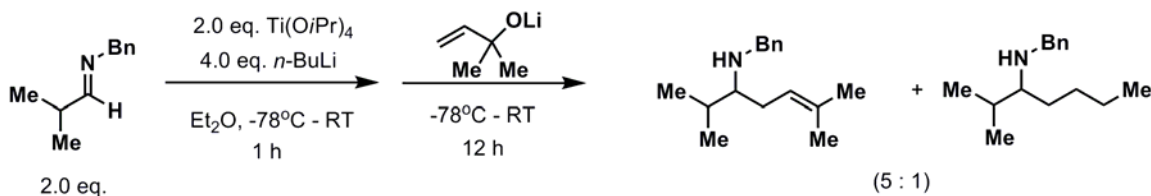

**N-benzyl-2,6-dimethylhept-5-en-3-amine (13)** General Procedure for Allylic Alcohol - Aliphatic Imine Coupling: To 6 mL of  $\text{Et}_2\text{O}$  under Ar and cooled to  $-78^\circ\text{C}$  is added successively  $\text{Ti}(\text{O}i\text{-Pr})_4$  (0.3 mL, 1.0 mmol), and  $n\text{-BuLi}$  (0.8 mL, 2.4 M sol'n in hexanes, 2.0 mmol). The resulting orange solution is stirred for 10 minutes, and then imine **8** (161 mg, 1.0 mmol in 1 mL THF) is added in one portion. The bright orange solution is allowed to warm to rt over 1 h, during which it becomes deep red-brown.

In a separate flask at  $-30^{\circ}\text{C}$  the lithium alkoxide of 2-methyl-3-buten-2-ol **12** (52  $\mu\text{L}$ , 0.5 mmol) is generated in 0.5 mL of THF with an equimolar amount of *n*-BuLi, and allowed to warm slowly to  $0^{\circ}\text{C}$  over 15 mins. The orange solution in the first flask is recooled to  $-78^{\circ}\text{C}$ , and alkoxide is transferred by syringe dropwise over 5 minutes. The resulting dark red solution is slowly warmed to rt over 12 h, and then 0.8 mL sat'd  $\text{NH}_4\text{Cl}_{(\text{aq})}$  is added dropwise. The resulting blue suspension is stirred 30 minutes, filtered, the flask washed 2x with 5 mL ethyl acetate, and concentrated. The material is loaded directly onto a flash column with 1:8 EtOAc : Hex, yielding 112 mg of an inseparable mixture of **13** (80%) + **13a** (15%), clear oil.  $^1\text{H}$  NMR (400 MHz,  $\text{CDCl}_3$ ): 7.30-7.11 (m, 5H), 5.09 (t,  $J_1 = 7.6$  Hz, 1H), 3.76 (s, 2H), 2.36 (m, 1H), 2.08 (m, 2H), 1.82 (s, 1H), 1.70 (d,  $J = 1.2$  Hz, 3H), 1.62 (s, 3H), 0.91 (d,  $J_1 = 1.2$  Hz, 3H), 0.89 (d,  $J_1 = 1.2$  Hz, 3H).  $^{13}\text{C}$  NMR: 141.4, 132.3, 128.3, 128.2, 126.7, 122.2, 62.7, 52.2, 30.1, 29.1, 25.9, 18.7, 18.4, 18.0. IR (thin film, NaCl plate,  $\text{cm}^{-1}$ ): 3027, 2958, 2928, 2871, 1494, 1453, 1382, 1104, 1028, 733, 697. HRMS: Calculated for  $\text{C}_{16}\text{H}_{25}\text{N} + \text{H}$ , 232.2060, observed 232.2065.

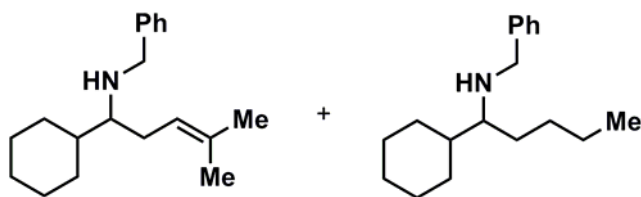

(6 : 1)

**5-cyclohexyl-5-(*N*-benzylamino)-2-methylpent-2-ene (15)**: Prepared from imine **14** and alcohol **12** following general procedure outlined above. Product was isolated (1:8 EA / Hex) as an inseparable mixture of **15** (62%) and **15a** (10%).  $^1\text{H}$  NMR (400 MHz,  $\text{CDCl}_3$ ): 7.32-7.23 (m, 5H), 5.11 (t,  $J = 7.24$  Hz, 1H), 3.76 (dd,  $J_1 = 15.2$  Hz,  $J_2 = 13.2$  Hz, 2H), 2.37 (m, 1H), 2.13 (m, 2H), 1.75-1.66 (m, 6H), 1.73 (s, 3H), 1.64 (s, 3H), 1.42 (m, 1H), 1.23 (m, 6H).  $^{13}\text{C}$  (100 MHz,  $\text{CDCl}_3$ ): 141.3, 133.3, 128.3, 128.21, 128.18, 126.7, 122.2, 62.3, 52.2, 40.9, 29.5, 29.4, 29.2, 26.93, 26.85, 26.79, 25.9, 18.0. IR (thin film, NaCl plate,  $\text{cm}^{-1}$ ): 3026, 2923, 2851, 1494, 1450, 1375, 1117, 1028, 984, 731, 697. HRMS: Calculated for  $\text{C}_{19}\text{H}_{29}\text{N}$  272.2373, observed 272.2392.

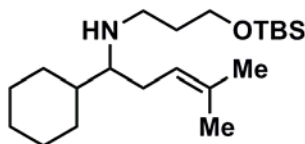

**5-(*N*-(3-*tert*-butoxypropyl))-5-cyclohexyl-2-methylpent-2-ene (17)**: Prepared from imine **16** and alcohol **12** following general procedure outlined above. 81% isolated yield (1:20 EtOAc / Hex).  $^1\text{H}$  (400 MHz,  $\text{CDCl}_3$ ): 5.11 (t,  $J = 7.6$  Hz, 1H), 3.67 (t,  $J = 6.4$  Hz, 2H), 2.64 (m, 2H), 2.26 (m, 1H), 2.04 (m, 2H), 1.71 (d,  $J_1 = 1$  Hz, 3H), 1.65 (m, 6H), 1.62 (s, 3H), 1.42-1.08 (m, 6H), 0.89 (s, 9H), 0.05 (s, 6H).  $^{13}\text{C}$  (100 MHz,  $\text{CDCl}_3$ ): 133.0, 122.4, 63.2, 61.6, 45.1, 40.9, 35.6, 29.7, 29.4, 29.2, 26.9, 26.83, 26.76, 25.98, 25.94, 18.4, 17.9, -5.3. IR (thin film, NaCl plate,  $\text{cm}^{-1}$ ): 2926, 2854, 1471, 1449, 1377, 1254, 1099, 835, 774. HRMS: Calculated for  $\text{C}_{21}\text{H}_{43}\text{NOSi} + \text{H}$  354.3147, observed 354.3194.

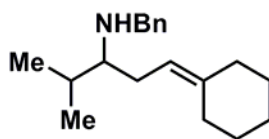

**3-(*N*-benzylamino)-4-methylpentenylcyclohexane (19):** Prepared from imine **8** and vinylcyclohexanol **18** following general procedure outlined above. 56% isolated yield.  $^1\text{H}$  (400 MHz,  $\text{CDCl}_3$ ): 7.35-7.20 (m, 5H), 5.05 (t,  $J = 7.6$  Hz, 1H), 3.77 (s, 2H), 2.35 (m, 1H), 2.20-2.04 (m, 5H), 1.83 (s, 1H), 1.55-1.20 (m, 6H), 0.98 (d,  $J_1 = 2.4$  Hz, 3H), 0.96 (d,  $J = 2.4$  Hz, 3H).  $^{13}\text{C}$  (100 MHz,  $\text{CDCl}_3$ ): 141.6, 141.3, 128.28, 128.26, 128.18, 126.7, 118.8, 62.8, 52.2, 37.4, 30.1, 28.9, 28.7, 28.1, 27.9, 26.9, 18.7, 18.3. HRMS: Calculated for  $\text{C}_{19}\text{H}_{29}\text{N} + \text{H}$  272.2373, observed 272.2378.

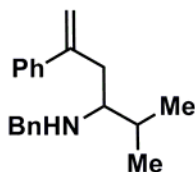

**4-(*N*-benzylamino)-5-methyl-2-phenylhex-1-ene (21):** Prepared from imine **8** and alcohol **20** following general procedure outlined above. 52% isolated yield.  $^1\text{H}$  (400 MHz,  $\text{CDCl}_3$ ): 7.31-7.20 (m, 10H), 5.31 (d,  $J = 1.6$  Hz), 5.12 (s, 1H), 3.76 (s, 1H), 3.69 (d,  $J = 12.8$  Hz, 1H), 3.56 (d,  $J = 13.2$  Hz, 1H), 2.74 (d,  $J = 11.6$  Hz, 1H), 2.44-2.39 (m, 2H), 1.89 (m, 1H), 0.93 (d,  $J = 3.2$  Hz, 3H), 0.92 (d,  $J = 3.2$  Hz, 3H).  $^{13}\text{C}$  (100 MHz,  $\text{CDCl}_3$ ): 147.0, 141.0, 140.9, 128.3, 128.2, 128.1, 127.5, 126.7, 126.4, 114.9, 59.8, 52.1, 36.7, 29.6, 18.5, 17.5. IR (thin film, NaCl plate,  $\text{cm}^{-1}$ ): HRMS: Calculated for  $\text{C}_{20}\text{H}_{25}\text{N} + \text{H}$  280.2021, observed 280.2069.

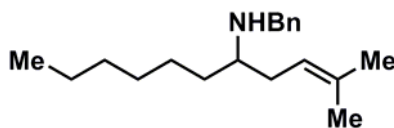

**5-(*N*-benzylamino)-2-methylundec-2-ene (23):** Prepared from imine **22** and alcohol **12** by general procedure outlined above. (N.B. This reaction works best when imine is freshly prepared before coupling. Lower yields are observed with older batches). 92% isolated yield.  $^1\text{H}$  (400 MHz,  $\text{CDCl}_3$ ): 7.32-7.16 (m, 5H), 5.11 (triplet of septets,  $J_1 = 7.2$  Hz,  $J_2 = 1.2$  Hz, 1H), 3.77 (s, 2H), 2.55 (m, 1H), 2.13 (t,  $J = 7.2$  Hz, 2H), 1.72 (s, 3H), 1.63 (s, 3H), 1.45-1.26 (m, 15H), 0.89 (t,  $J = 7.2$  Hz, 4H).  $^{13}\text{C}$  (100 MHz,  $\text{CDCl}_3$ ): 141.1, 133.6, 128.3, 128.1, 126.7, 121.4, 57.3, 51.4, 34.2, 32.7, 31.9, 29.6, 25.94, 25.87, 22.7, 18.1, 14.1. IR (thin film, NaCl plate,  $\text{cm}^{-1}$ ): 3027, 2956, 2926, 2855, 1494, 1454, 1376, 1103, 1028, 729, 697. HRMS: Calculated for  $\text{C}_{19}\text{H}_{31}\text{N} + \text{H}$  274.2529, observed 274.2554.

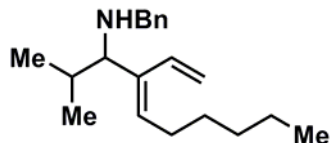

**(3E) 3-(1-N-benzylamino-2-methylpropyl)-4-methylpenta-1,3-diene (25):** To a solution of  $\text{Ti}(\text{O}i\text{-Pr})_4$  (0.15 mL, 0.5 mmol, 1.0 eq.) in 3 mL THF at  $-78^\circ\text{C}$  is added dropwise *n*-BuLi (0.48 mL of 2.3M sol'n in hexanes, 1.0 mmol, 2.0 eq.). The resulting orange solution is stirred for 5 minutes, then imine **8** (81 mg, 1 mmol, 1.0 eq.) is added in 0.5 mL THF dropwise. The bright orange solution is warmed to rt over 1.25 h, resulting in a red-brown suspension.

The solution is recooled to  $-78^\circ\text{C}$ , and the lithium alkoxide of allene **24** (pregenerated in 0.5 mL THF at  $-30^\circ\text{C}$  with equimolar *n*-BuLi, 56 mg, 0.5 mmol, 1.0 eq.) is added dropwise by syringe over 2 minutes. The solution is stirred for 20 minutes at  $-78^\circ\text{C}$ , and then placed in an oil bath at  $60^\circ\text{C}$  for 12 h. The reaction is cooled to rt, and 0.8 mL  $\text{NH}_4\text{Cl}_{(\text{aq})}$  is added dropwise, resulting in a bluish-white slurry. The reaction is allowed to stir 20 minutes to break up salts, then filtered, washing precipitate 3x with 5 mL EtOAc. After concentration, the residue is loaded directly to a silica flash column (1:20 EtOAc / Hex  $\rightarrow$  1:10) to yield 56 mg (78%) of diene **25** as a clear oil.  $^1\text{H}$  (400 MHz,  $\text{CDCl}_3$ ): 7.35-7.20 (m, 5H), 6.53 (dd,  $J_1 = 18$  Hz,  $J_2 = 11.6$  Hz, 1H), 5.50 (t,  $J = 7.2$  Hz, 1H), 5.31 (dd,  $J_1 = 17.6$  Hz,  $J_2 = 1.6$  Hz, 1H), 5.13 (dt,  $J_1 = 11.2$  Hz,  $J_2 = 1.2$  Hz, 1H), 3.74 (d,  $J = 13.2$  Hz, 1H), 3.49 (d,  $J = 13.2$  Hz, 1H), 2.93 (d,  $J = 7.6$  Hz, 1H), 2.23 (q,  $J = 7.2$  Hz, 2H), 1.76 (sept, 1H), 1.50-1.30 (m, 10H), 0.93 (d,  $J = 6.8$  Hz, 3H), 0.89 (t,  $J = 6.8$  Hz, 2H), 0.83 (d,  $J = 6.8$  Hz, 3H).  $^{13}\text{C}$  (100 MHz,  $\text{CDCl}_3$ ): 141.4, 136.7, 133.1, 131.6, 128.22, 128.26, 126.6, 114.7, 67.6, 51.5, 31.9, 31.6, 29.7, 27.7, 25.6, 20.4, 19.4, 14.1. IR (thin film, NaCl plate,  $\text{cm}^{-1}$ ): 2956, 2925, 2857, 1454, 900, 697. HRMS: Calculated for  $\text{C}_{20}\text{H}_{31}\text{N} + \text{H}$  286.2529, observed 286.2551.

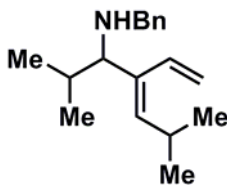

**(3E) 3-(N-benzylamino-2-methylpropyl)-5-methylhexa-1,3-diene (27):** To a solution of  $\text{Ti}(\text{O}i\text{-Pr})_4$  (0.3 mL, 1.0 mmol, 2.0 eq.) in 4 mL THF at  $-78^\circ\text{C}$  is added dropwise *n*-BuLi (0.9 mL of 2.3M sol'n in hexanes, 2.0 mmol, 4.0 eq.). The resulting orange solution is stirred for 5 minutes, then imine **8** (161 mg, 1 mmol, 2.0 eq.) is added in 0.5 mL THF dropwise. The bright orange solution is warmed to rt over 1.25 h, resulting in a red-brown suspension.

The solution is recooled to  $-78^\circ\text{C}$ , and the lithium alkoxide of allene **26** (pregenerated in 0.5 mL THF at  $-30^\circ\text{C}$  with equimolar *n*-BuLi, 56 mg, 0.5 mmol, 1.0 eq.) is added dropwise by syringe over 2 minutes. The solution is stirred for 20 minutes at  $-78^\circ\text{C}$ , and then warmed to rt overnight. The reaction at rt with 0.8 mL  $\text{NH}_4\text{Cl}_{(\text{aq})}$ , allowed to stir 20 minutes to break up salts, and filtered, washing precipitate 3x with 5 mL

EtOAc. After concentration, the residue is loaded directly to a silica flash column (1:15 EtOAc / Hex) to yield 97 mg (75%) of diene **27** as a clear oil.  $^1\text{H}$  (400 MHz,  $\text{CDCl}_3$ ): 7.31 (m, 5H), 6.55 (dd,  $J_1 = 17.2$  Hz,  $J_2 = 11.6$  Hz, 1H), 5.33 (m, 1H), 5.31 (dt,  $J_1 = 9.6$  Hz,  $J_2 = 1.6$  Hz, 1H), 5.12 (dt,  $J_1 = 11.6$  Hz,  $J_2 = 1.6$  Hz, 1H), 3.75 (d, 13.2 Hz, 1H), 3.50 (d, 13.2 Hz, 1H), 2.91 (d,  $J = 7.2$  Hz, 1H), 2.83 (m, 1H), 1.77 (apparent septet,  $J = 7.2$  Hz, 1H), 1.38 (bm, 1H), 1.02 (dd,  $J_1 = 7.2$  Hz,  $J_2 = 6.8$  Hz, 6H), 0.94 (d,  $J = 6.8$  Hz, 3H), 0.84 (d,  $J = 6.8$  Hz, 3H).  $^{13}\text{C}$  (100 MHz,  $\text{CDCl}_3$ ): 141.4, 138.9, 134.3, 133.2, 128.3, 128.2, 126.7, 114.6, 67.2, 51.4, 31.9, 26.9, 23.5, 23.4, 20.4, 19.3. IR (thin film, NaCl plate,  $\text{cm}^{-1}$ ): 2958, 2930, 2068, 1729, 1464, 1383, 1361, 1272, 1122, 1100, 1073, 901, 737, 698. HRMS: Calculated for  $\text{C}_{16}\text{H}_{25}\text{N} + \text{H}$  258.2177, observed 258.2219

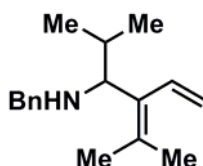

**3-(1-N-benzylamino-2-methylpropyl)-4-methylpenta-1,3-diene (29)**: To a solution of  $\text{Ti}(\text{O}i\text{-Pr})_4$  (0.3 mL, 1.0 mmol, 2.0 eq.) in 4 mL THF at  $-78^\circ\text{C}$  is added dropwise *n*-BuLi (0.8 mL of 2.5M sol'n in hexanes, 2.0 mmol, 4.0 eq.). The resulting orange solution is stirred for 5 minutes, then imine **8** (161 mg, 1 mmol, 2.0 eq.) is added in 0.5 mL THF dropwise. The bright orange solution is warmed to rt over 1.25 h, resulting in a red-brown suspension.

The solution is recooled to  $-78^\circ\text{C}$ , and the lithium alkoxide of allene **28** (pregenerated in 0.5 mL THF at  $-30^\circ\text{C}$  with equimolar *n*-BuLi, 49 mg, 0.5 mmol, 1.0 eq.) is added dropwise by syringe over 2 minutes. The solution is stirred for 20 minutes at  $-78^\circ\text{C}$ , and then warmed to rt overnight. 0.8 mL  $\text{NH}_4\text{Cl}_{(\text{aq})}$  is then added and the reaction is stirred 20 minutes to break up salts, filtered, and the precipitate washed 3x with 5 mL EtOAc. After concentration, the residue is loaded directly to a silica flash column (1:15 EtOAc / Hex) to yield 63 mg (52%) of diene **29** as a clear oil.  $^1\text{H}$  (400 MHz,  $\text{CDCl}_3$ ): 7.35-7.18 (m, 5H), 6.26 (dd,  $J_1 = 17.6$  Hz,  $J_2 = 11.6$  Hz, 1H), 5.19 (dd,  $J_1 = 11.2$  Hz,  $J_2 = 2.4$  Hz, 1H), 5.15 (m, 1H), 3.68 (d,  $J = 13.2$  Hz, 1H), 3.43 (d,  $J = 13.6$  Hz, 1H), 3.15 (d,  $J = 9.6$  Hz, 1H), 1.81 (s, 3H), 1.67 (m, 1H), 1.62 (s, 3H), 1.01 (d,  $J = 6.8$  Hz, 3H), 0.95, (m, 1H), 0.72 (d,  $J = 6.8$  Hz, 3H).  $^{13}\text{C}$  (100 MHz,  $\text{CDCl}_3$ ): 141.5, 134.4, 132.9, 132.1, 128.21, 128.19, 125.6, 117.3, 64.1, 51.3, 31.9, 22.5, 20.9, 20.8, 19.9. IR (thin film, NaCl plate,  $\text{cm}^{-1}$ ): 3027, 2955, 2924, 2869, 1644, 1621, 1603, 1494, 1454, 1381, 1363, 1156, 1094, 918, 820, 736, 698. HRMS: Calculated for  $\text{C}_{17}\text{H}_{25}\text{N} + \text{H}$  244.2021, observed 244.2072.

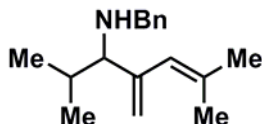

**2-(1-*N*-benzylamino-2-methylpropyl)-4-methylpenta-1,3-diene (31):** To a solution of  $\text{Ti}(\text{O}i\text{-Pr})_4$  (0.3 mL, 1.0 mmol, 2.0 eq.) in 4 mL THF at  $-78^\circ\text{C}$  is added dropwise *n*-BuLi (0.8 mL of 2.5M sol'n in hexanes, 2.0 mmol, 4.0 eq.). The resulting orange solution is stirred for 5 minutes, then imine **8** (161 mg, 1 mmol, 2.0 eq.) is added in 0.5 mL THF dropwise. The bright orange solution is warmed to rt over 1.25 h, resulting in a red-brown suspension.

The solution is recooled to  $-78^\circ\text{C}$ , and the lithium alkoxide of allene **30** (pregenerated in 0.5 mL THF at  $-30^\circ\text{C}$  with equimolar *n*-BuLi, 49 mg, 0.5 mmol, 1.0 eq.) is added dropwise by syringe over 2 minutes. The solution is stirred for 20 minutes at  $-78^\circ\text{C}$ , and then warmed to rt overnight. 0.8 mL  $\text{NH}_4\text{Cl}_{(\text{aq})}$  is added at rt, allowed to stir 20 minutes to break up salts, filtered, and the precipitate washed 3x with 5 mL EtOAc. After concentration, the residue is loaded directly to a silica flash column (1:15 EtOAc / Hex) to yield 70 mg (58%) of diene **31** as a lt. yellow oil.  $^1\text{H}$  (400 MHz,  $\text{CDCl}_3$ ): 7.35-7.20 (m, 5H), 5.59 (m, 1H), 4.98 (d,  $J = 2.4$  Hz, 1H), 4.92 (m, 1H), 3.71 (d,  $J = 13.6$  Hz, 1H), 3.45 (d,  $J = 13.2$  Hz, 1H), 2.55 (d,  $J = 8.8$  Hz, 1H), 1.79 (d,  $J = 1.6$  Hz, 3H), 1.76 (d,  $J = 1.2$  Hz, 3H), 1.58 (m, 1H), 0.90 (d,  $J = 6.4$  Hz, 3H), 0.75 (d,  $J = 6.8$  Hz, 3H).  $^{13}\text{C}$  (100 MHz,  $\text{CDCl}_3$ ): 144.7, 140.1, 135.6, 127.2, 125.6, 121.4, 114.4, 70.0, 66.9, 50.4, 30.1, 25.8, 24.6, 19.3, 18.79, 18.75. IR (thin film, NaCl plate,  $\text{cm}^{-1}$ ): 3028, 2960, 2929, 2871, 1677, 1646, 1624, 1604, 1495, 1453, 1382, 1157, 1101, 1071, 1028, 984, 901, 734, 698. HRMS: Calculated for  $\text{C}_{17}\text{H}_{25}\text{N} + \text{H}$  244.2021, observed 244.2071.

## $^1\text{H}$ and $^{13}\text{C}$ Spectra

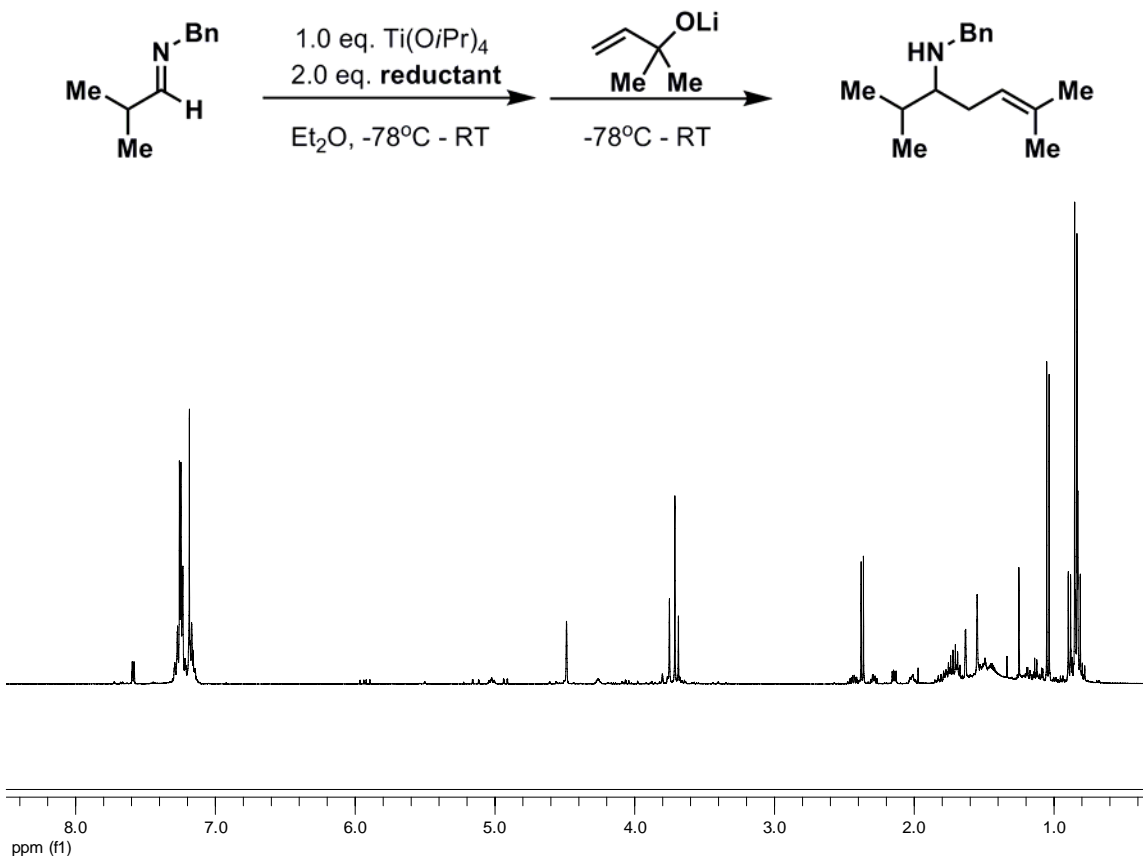

Crude  $^1\text{H}$  NMR(400MHz,  $\text{CDCl}_3$ ); formation of **13** with  $\text{C}_5\text{H}_9\text{MgCl}$  /  $\text{Ti}(\text{O}i\text{-Pr})_4$  / alcohol **12**, 2 h at rt

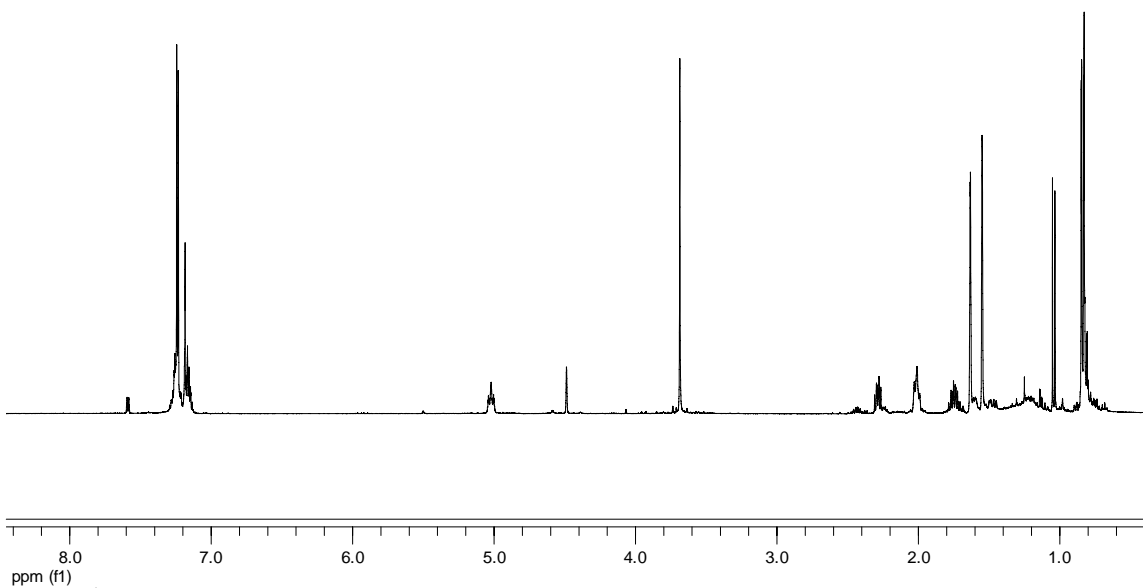

Crude  $^1\text{H}$  NMR(400 MHz,  $\text{CDCl}_3$ ); formation of **13** with  $n\text{-BuLi}$  /  $\text{Ti}(\text{O}i\text{-Pr})_4$  / alcohol **12**, 2 h at rt



Compound 13 + 13a

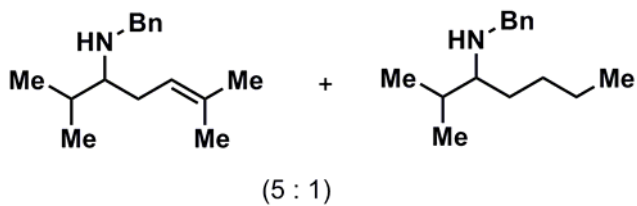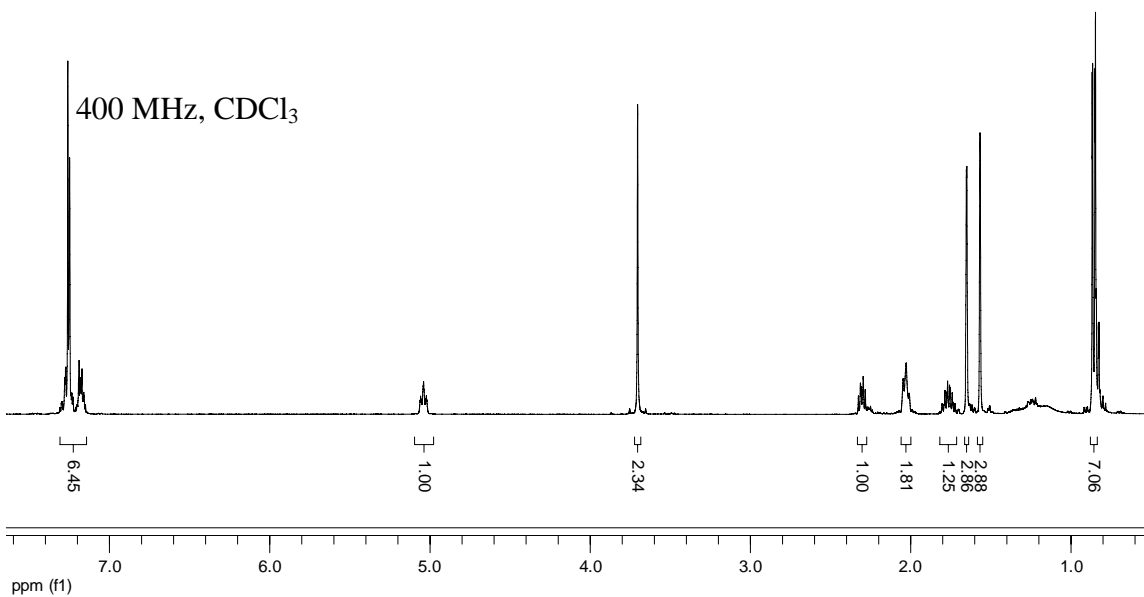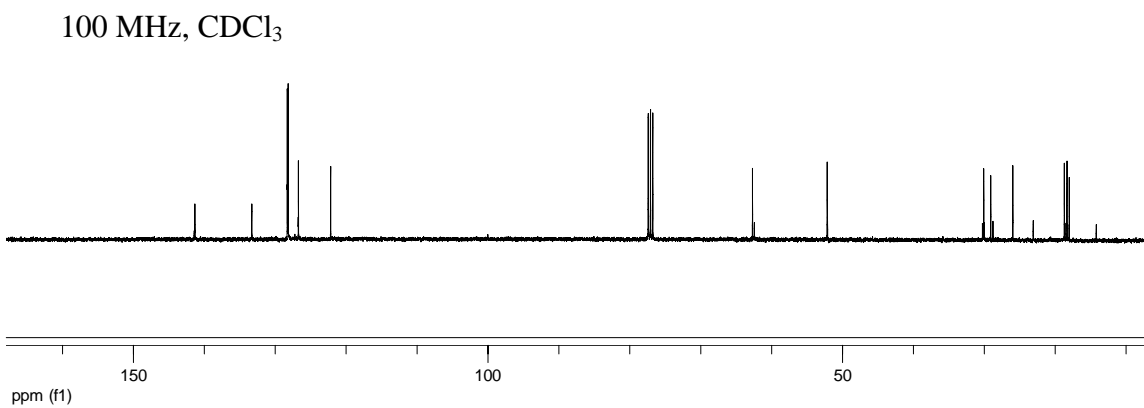

Compound **15** + **15a**

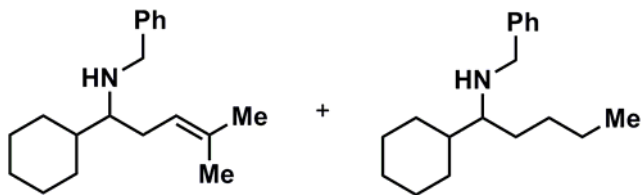

(6 : 1)

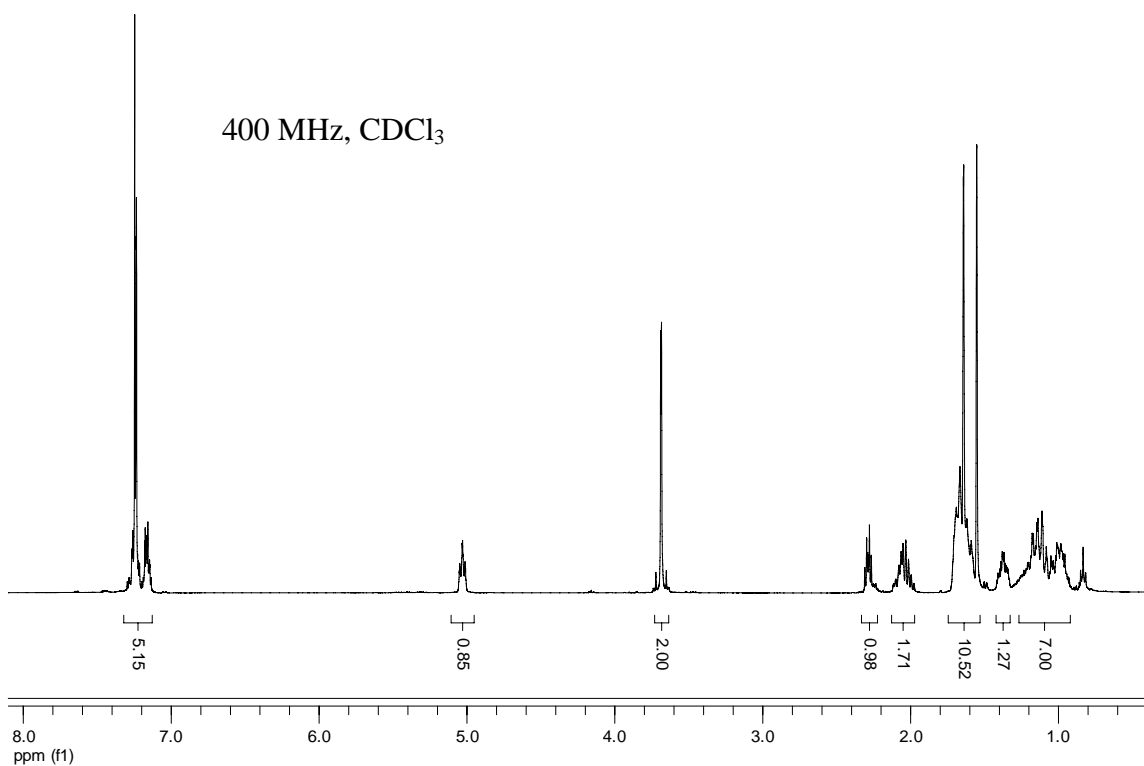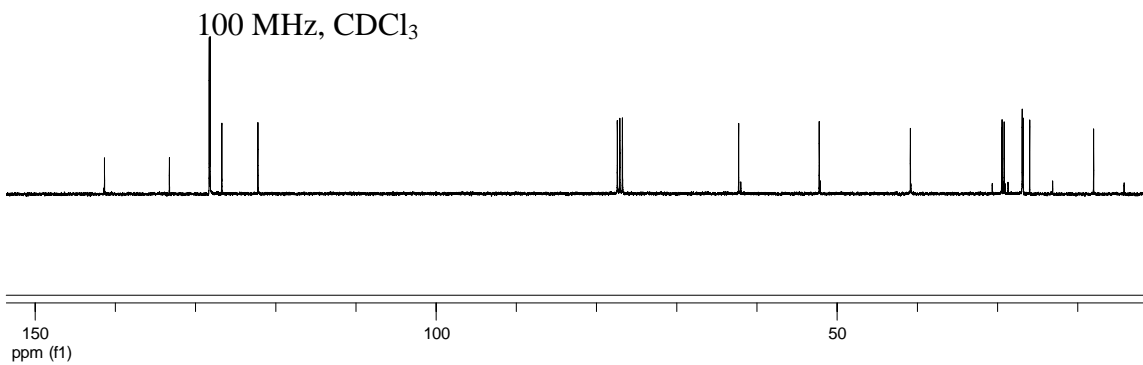

Compound 17

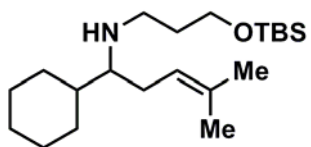

400 MHz, CDCl<sub>3</sub>

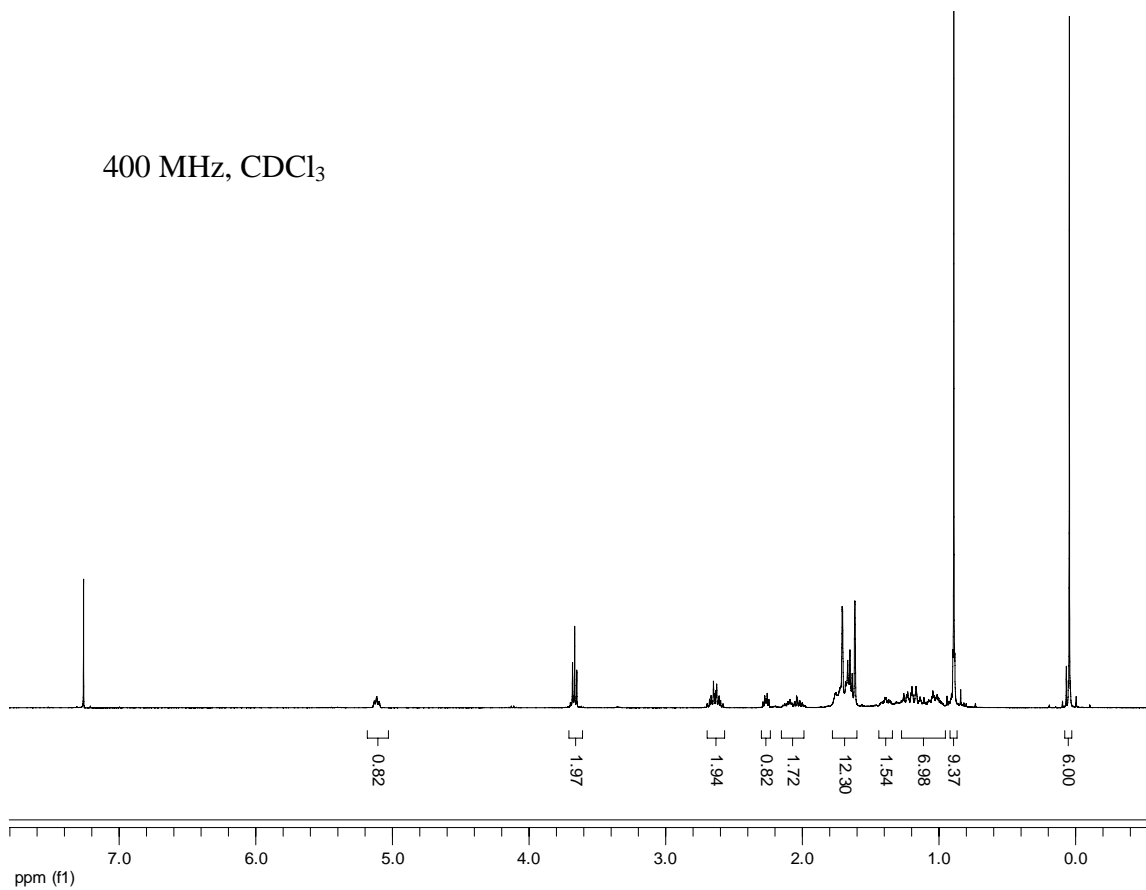

100 MHz, CDCl<sub>3</sub>

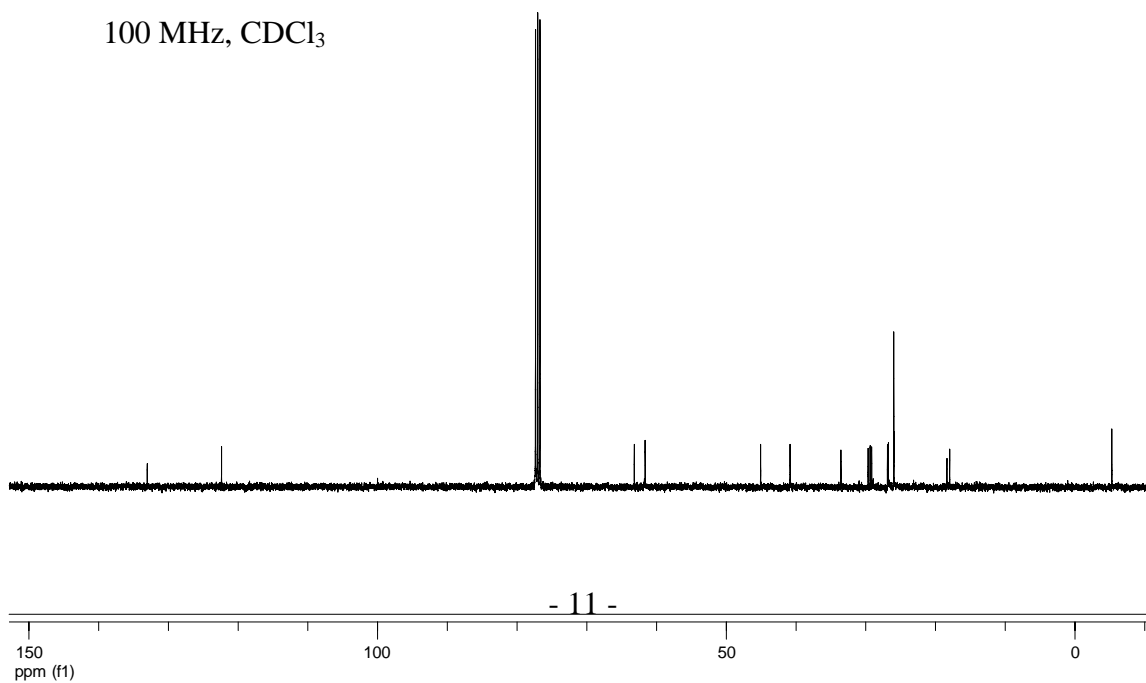

Compound 19

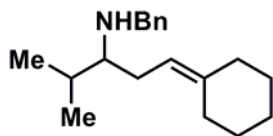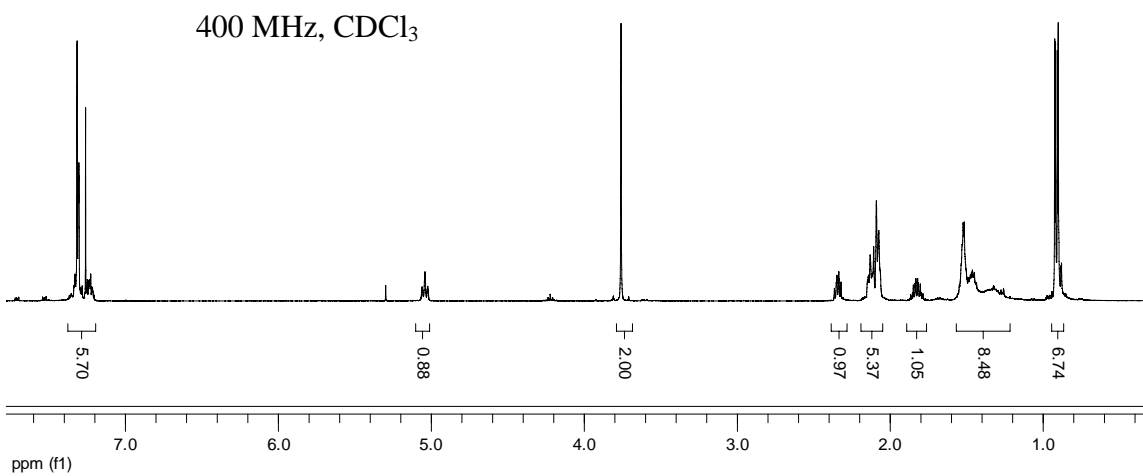

100 MHz, CDCl<sub>3</sub>

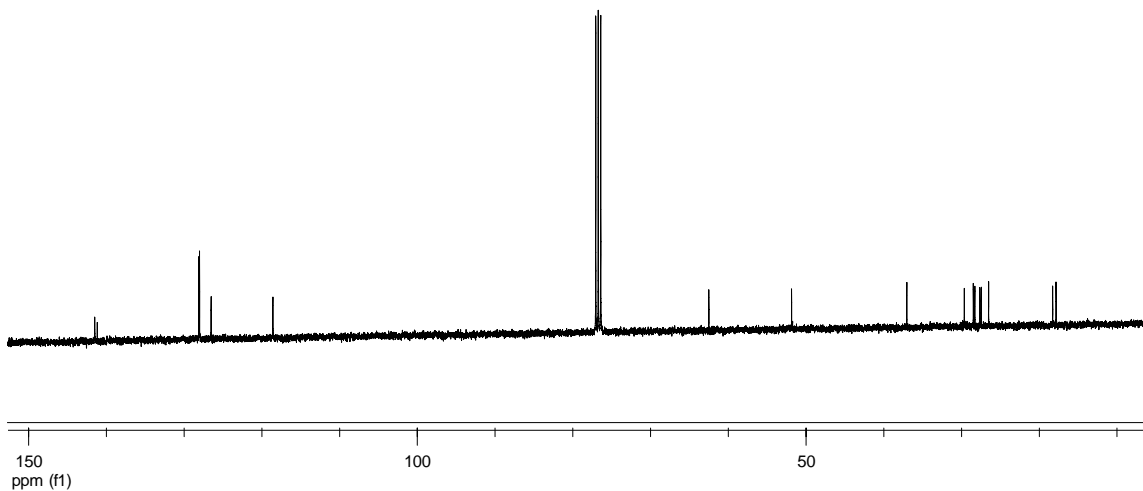

Compound 21

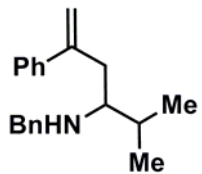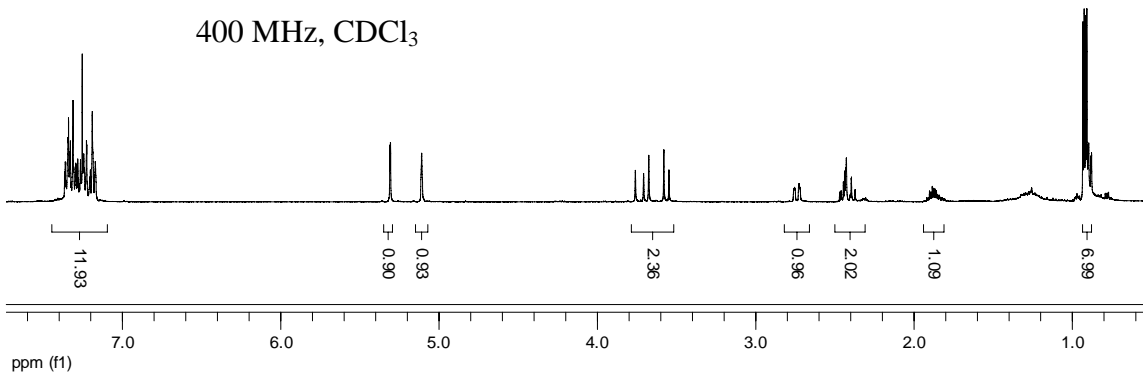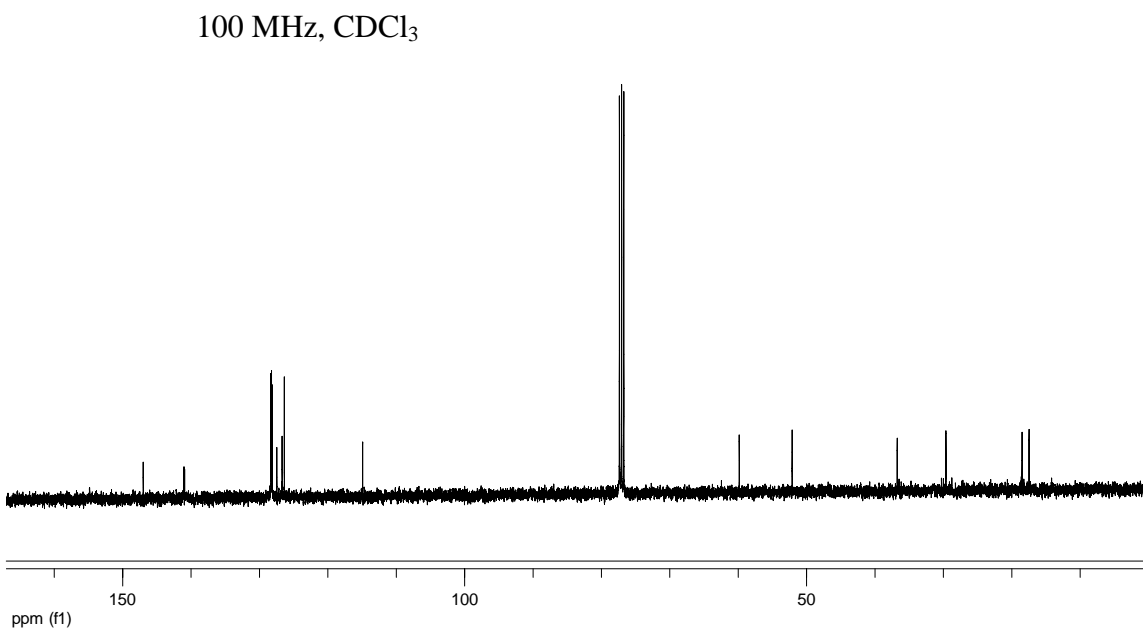



Compound 25

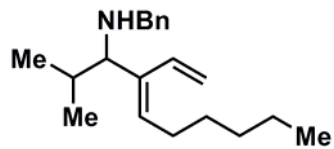

*E* : *Z* >10 : 1 (minor peaks are *Z* isomer; crude ratio 4 : 1)

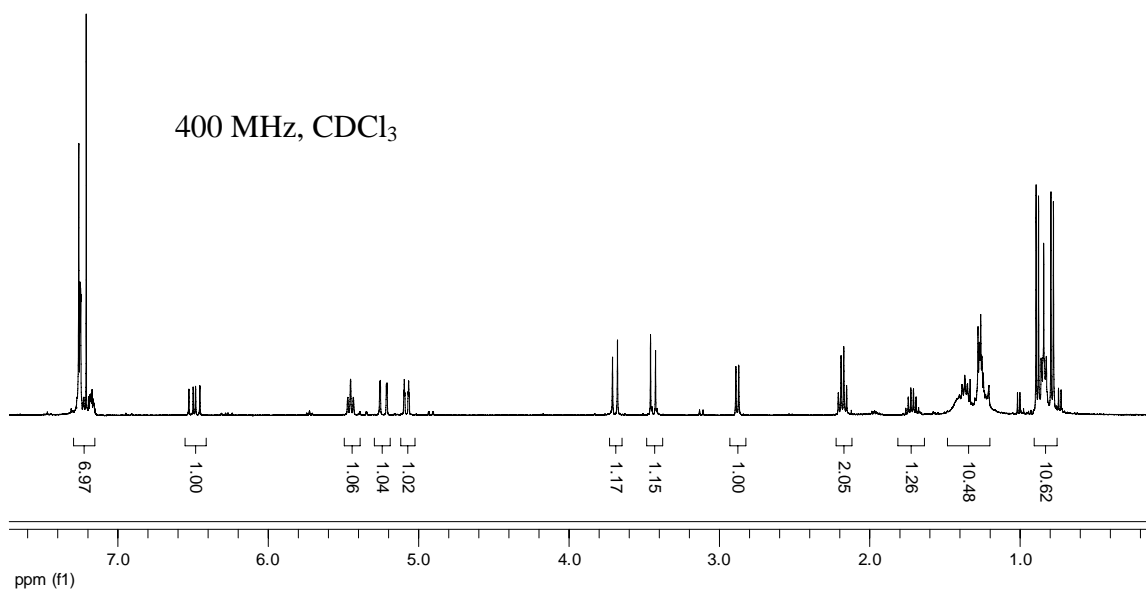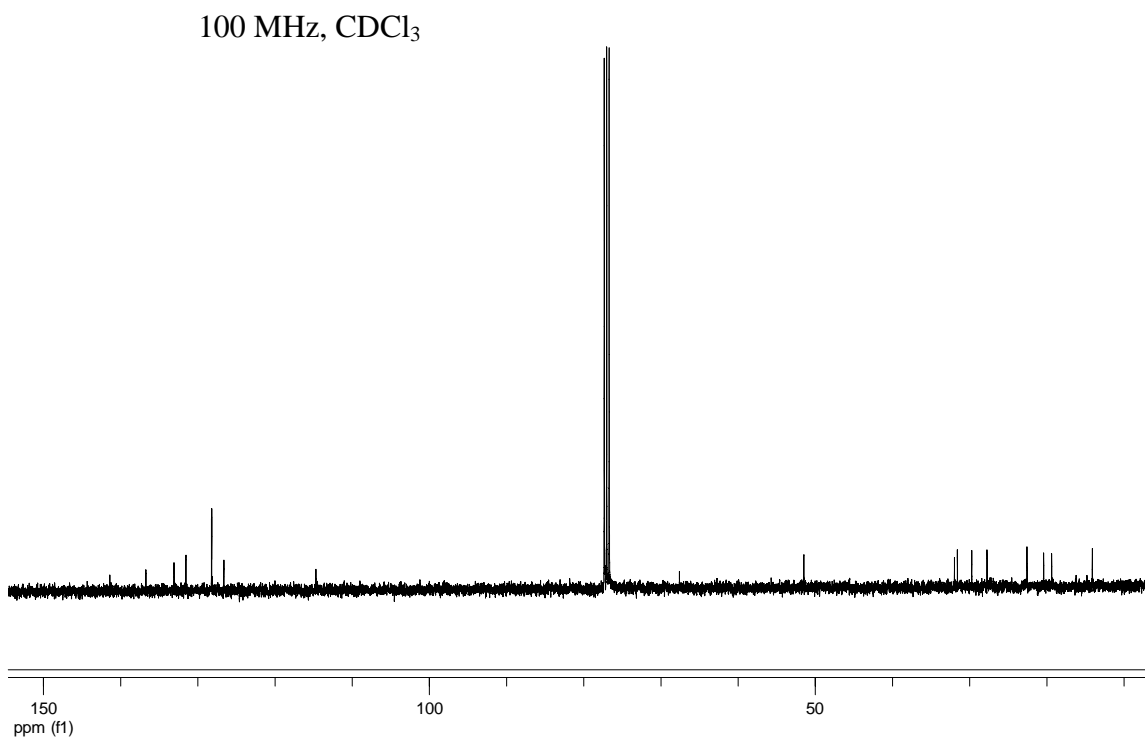

Compound 27

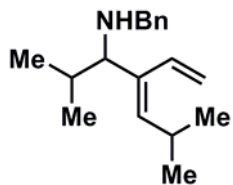

*E* : *Z* >10 : 1 (minor peaks are *Z* isomer)

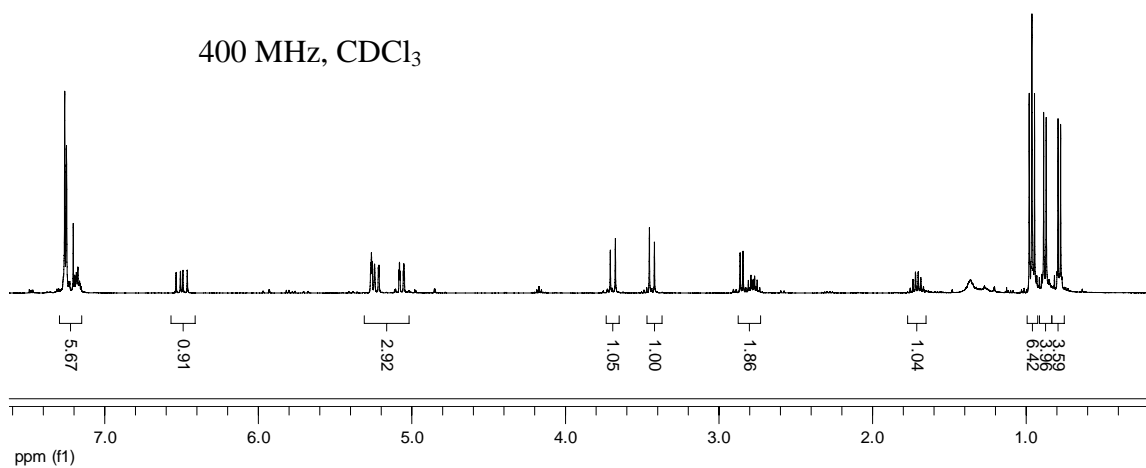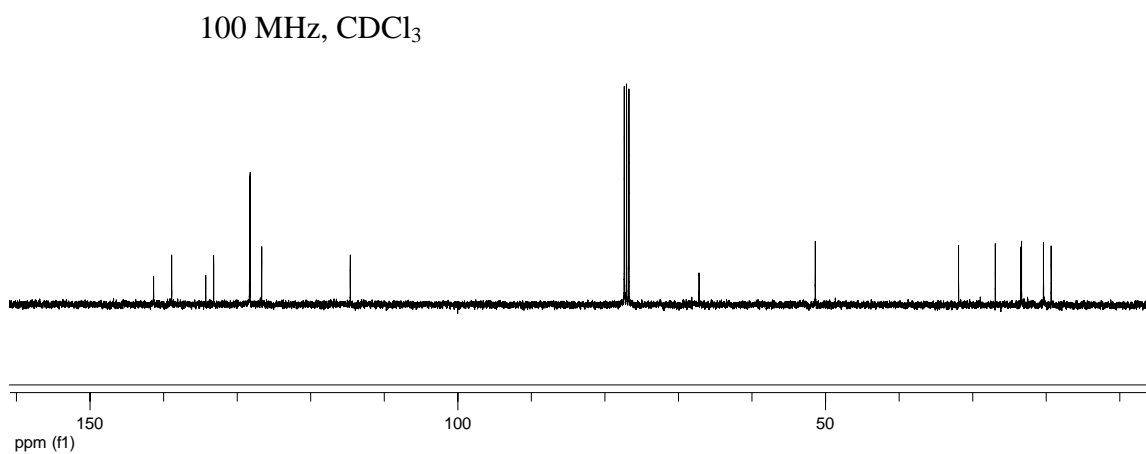



Compound 29

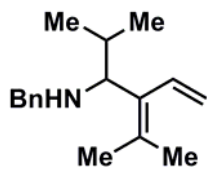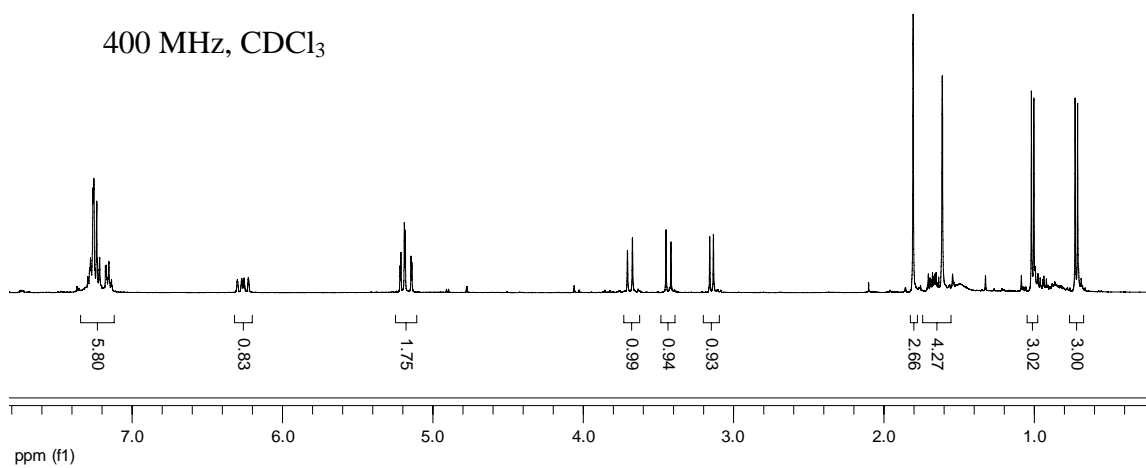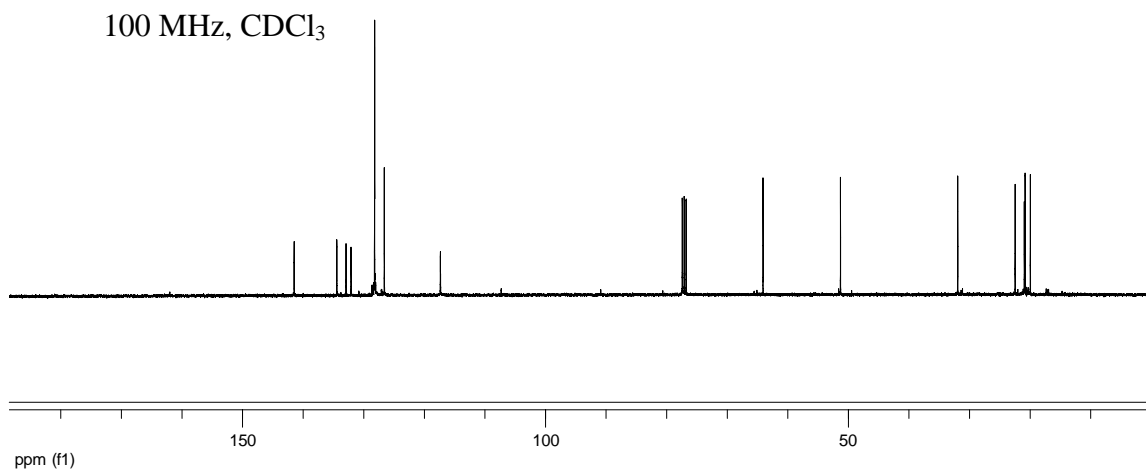

Compound **31**

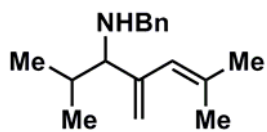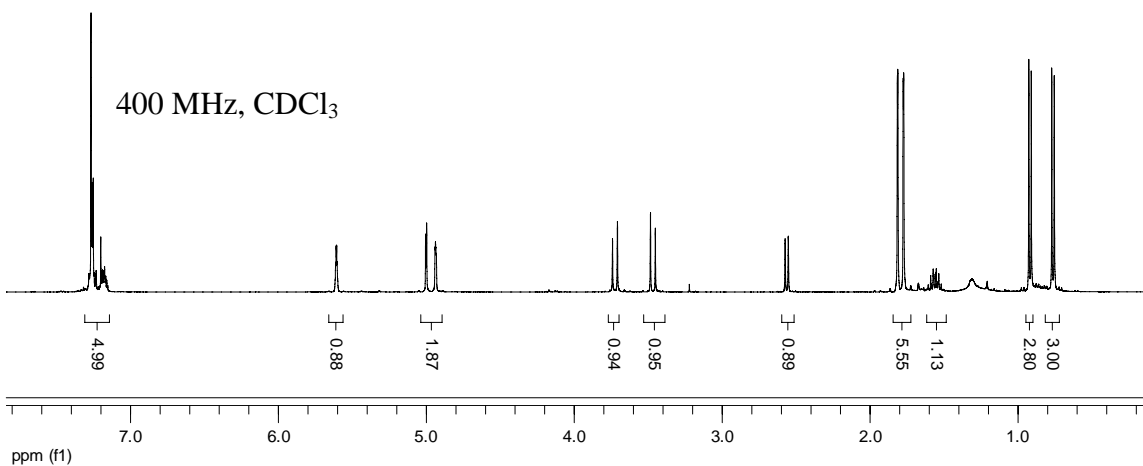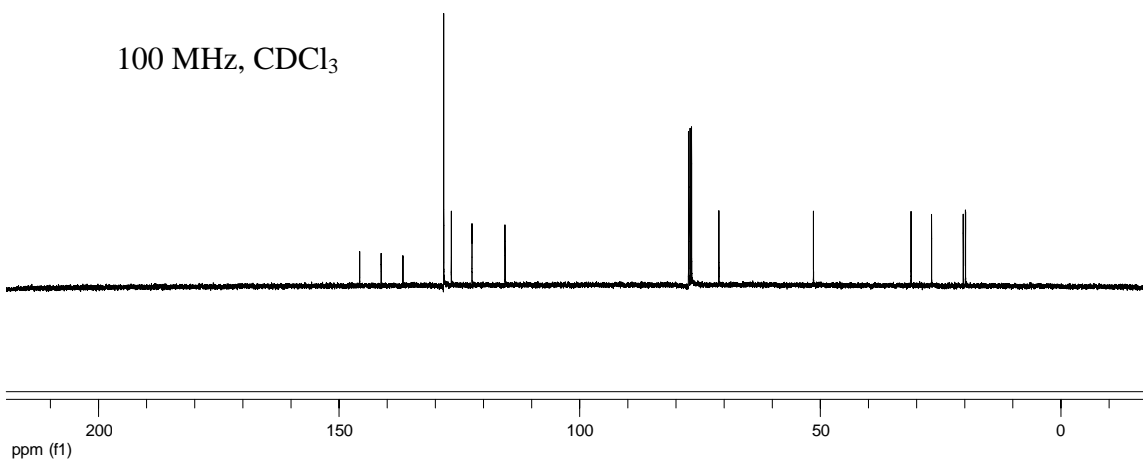

<sup>1</sup> Love, B.E.; Jones, E.G. *J. Org. Chem.* **1999**, *64*, 3755-3756.

<sup>2</sup> Joly, G.D.; Jacobsen, E.N. *J. Am. Chem. Soc.* **2004**, *126*, 4102.

<sup>3</sup> Newman-Evans, R.H.; Simon, R.J.; Carpenter, B.K. *J. Org. Chem.* **1990**, *55*, 695-711.

<sup>4</sup> Jonasson, C.; Horváth, A.; Bäckvall, J-E. *J. Am. Chem. Soc.* **2000**, *122*, 9600-9609.

<sup>5</sup> Sim, S.H.; Park, H-J.; Lee, S.I.; Chung, Y.K. *Org. Lett.* **2008**, *10*, 433-436.

<sup>6</sup> Imada, Y.; Nishida, M.; Kutsuwa, K.; Murahashi, S-I.; Naota, T. *Org. Lett.* **2005**, *7*, 5837.

<sup>7</sup> Searles, S.; Li, Y.; Nassim, B.; Robert Lopes, M.T.; Tran, P.T.; Crabbé, P. *J. Chem. Soc. Perkin Trans. I*, **1984**, *4*, 747-751.
